# Supplementary material for: Human bone marrow stem/stromal cell osteogenesis is regulated via mechanically activated osteocyte‐derived extracellular vesicles
Source: PubMed Central journal article supplement (PMC7581449; doi:10.1002/sctm.19-0405), 2020-07-16
Supplement: SCT3-9-1431-s001.pdf [file SCT3-9-1431-s001.pdf]

## Supplemental Files

### Human bone marrow stem/stromal cell osteogenesis is regulated via mechanically activated osteocyte-derived extracellular vesicles

#### Authors

Kian F. Eichholz<sup>1,2,3</sup>, Ian Woods<sup>1,2,3</sup>, Mathieu Riffault<sup>1,2,3</sup>, Gillian P. Johnson<sup>1,2,3</sup>, Michele Corrigan<sup>1,2,3</sup>, Michelle C. Lowry<sup>6</sup>, Nian Shen<sup>1,2,3</sup>, Marie-Noelle Labour<sup>1,2,3</sup>, Kieran Wynne<sup>4,5</sup>, Lorraine O'Driscoll<sup>6</sup>, David A. Hoey<sup>1,2,3,7</sup>

#### Affiliations

<sup>1</sup>Dept. Mechanical, Aeronautical and Biomedical Engineering, Materials and Surface Science Institute, University of Limerick, Limerick, Ireland

<sup>2</sup>Trinity Centre for Biomedical Engineering, Trinity Biomedical Sciences Institute, Trinity College Dublin, Ireland

<sup>3</sup>Dept. of Mechanical and Manufacturing Engineering, School of Engineering, Trinity College Dublin, Ireland.

<sup>4</sup>UCD Conway Institute of Biomolecular and Biomedical Research, University College Dublin, Dublin 4, Ireland.

<sup>5</sup>Mass Spectrometry Resource, University College Dublin, Dublin 4, Ireland.

<sup>6</sup>School of Pharmacy and Pharmaceutical Sciences and Trinity Biomedical Sciences Institute, Trinity College Dublin, Dublin, Ireland.

<sup>7</sup>Advanced Materials and Bioengineering Research Centre, Trinity College Dublin & RCSI.

#### Address for correspondence:

David Hoey,

Department of Mechanical and Manufacturing Engineering, School of Engineering,

Trinity College Dublin, Dublin 2, Ireland

[dahoe@tcd.ie](mailto:dahoey@tcd.ie)

#### Author Contributions:

K.F.E.: Conception and design, Collection and/or assembly of data, Data analysis and interpretation, Manuscript writing. I.W.: Collection and/or assembly of data, Data analysis and interpretation. G.P.J.: Collection and/or assembly of data, Data analysis and interpretation. N.S.: Collection and/or assembly of

data, Data analysis and interpretation. M.C.: Collection and/or assembly of data, Data analysis and interpretation. M.N.L.: Collection and/or assembly of data, Data analysis and interpretation. K.W.: Collection and/or assembly of data and Data analysis. M.C.L.: Collection and/or assembly of data. L.O'D.: Data analysis and interpretation, Manuscript writing, Financial support. D.A.H.: Conception and design, Data analysis and interpretation, Manuscript writing, Financial support, Final approval of manuscript.

### Supplementary figures and tables

**Table S1** Primer sequences and concentrations employed in quantitative PCR analysis.

| Gene symbol  | Tm (°C) | Primer concentration | Sequence              | Amplicon size |
|--------------|---------|----------------------|-----------------------|---------------|
| <i>18s</i>   | 60      | 300 nM               | ATCGGGGATTGCAATTATTC  | 130bp         |
|              |         |                      | CTCACTAAACCATCCAATCG  |               |
| <i>GAPDH</i> | 60      | 300 nM               | ACAGTTGCCATGTAGACC    | 95bp          |
|              |         |                      | TTTTTGGTTGAGCACAGG    |               |
| <i>COX2</i>  | 60      | 400 nM               | AAGCAGGCTAATACTGATAGG | 113bp         |
|              |         |                      | TGTTGAAAAGTAGTTCTGGG  |               |
| <i>OCN</i>   | 65      | 400 nM               | CACTCCTCGCCCTATTGGC   | 112bp         |
|              |         |                      | CCCTCCTGCTTGGACACAAAG |               |
| <i>OPN</i>   | 60      | 400 nM               | GACCAAGGAAAACACTACTAC | 84bp          |
|              |         |                      | CTGTTTAACTGGTATGGCAC  |               |
| <i>RUNX2</i> | 60      | 400 nM               | GCAGTATTTACAACAGAGGG  | 112bp         |
|              |         |                      | TCCCAAAAGAAGTTTTGCTG  |               |
| <i>OSX</i>   | 60      | 400 nM               | TGAGGAGGAAGTTCACTATG  | 200bp         |
|              |         |                      | CATTAGTGCTTGTAAGGGG   |               |

**Table S2** Functional enrichments in CM proteins indicated in Figure 3C using String DB, with observed gene count out of a total of 105 genes and FDR cut-off of 2%. (note: 105 genes were identified from 97 proteins)

| Pathway description                                                    | Observed gene count | False discovery rate (FDR) |
|------------------------------------------------------------------------|---------------------|----------------------------|
| <b>GOCC (Gene Ontology Cellular Component)</b>                         |                     |                            |
| extracellular exosome                                                  | 71                  | 1.72E-41                   |
| extracellular region part                                              | 76                  | 5.05E-39                   |
| extracellular region                                                   | 77                  | 1.20E-35                   |
| membrane-bounded vesicle                                               | 70                  | 2.07E-34                   |
| extracellular space                                                    | 47                  | 7.88E-32                   |
| extracellular matrix                                                   | 26                  | 9.57E-22                   |
| proteinaceous extracellular matrix                                     | 22                  | 5.85E-18                   |
| cytoplasmic membrane-bounded vesicle                                   | 26                  | 1.80E-12                   |
| cytoplasmic vesicle                                                    | 24                  | 9.53E-10                   |
| myelin sheath                                                          | 12                  | 9.48E-09                   |
| <b>GOBP (Gene Ontology Biological Process)</b>                         |                     |                            |
| response to stress                                                     | 36                  | 6.92E-07                   |
| antigen processing and presentation of peptide antigen via MHC class I | 6                   | 4.09E-06                   |
| protein folding                                                        | 10                  | 8.52E-06                   |
| response to wounding                                                   | 13                  | 2.05E-05                   |
| regulation of biological process                                       | 63                  | 5.41E-05                   |
| pyruvate metabolic process                                             | 6                   | 1.73E-04                   |
| extracellular matrix organization                                      | 9                   | 1.73E-04                   |
| biological regulation                                                  | 63                  | 1.99E-04                   |
| glycolytic process                                                     | 5                   | 2.85E-04                   |
| response to endogenous stimulus                                        | 19                  | 2.85E-04                   |
| <b>GOMF (Gene Ontology Molecular Function)</b>                         |                     |                            |
| protein complex binding                                                | 20                  | 7.80E-09                   |
| protein binding                                                        | 52                  | 7.85E-09                   |
| binding                                                                | 73                  | 5.31E-08                   |
| RNA binding                                                            | 26                  | 3.35E-07                   |
| poly(A) RNA binding                                                    | 23                  | 3.35E-07                   |
| isomerase activity                                                     | 9                   | 9.02E-06                   |
| macromolecular complex binding                                         | 21                  | 1.05E-05                   |

|                     |    |          |
|---------------------|----|----------|
| receptor binding    | 20 | 1.22E-05 |
| calcium ion binding | 15 | 1.22E-05 |
| peptide binding     | 9  | 1.90E-05 |

**Table S3** Functional enrichments in network using String DB with observed gene count out of a total of 34 genes and FDR cut-off of 2%.

| Pathway description                     | Observed gene count | False discovery rate (FDR) | Associated proteins in network                                                                                                                                                        |
|-----------------------------------------|---------------------|----------------------------|---------------------------------------------------------------------------------------------------------------------------------------------------------------------------------------|
| GOCC (Gene Ontology Cellular Component) |                     |                            |                                                                                                                                                                                       |
| extracellular region                    | 26                  | 1.16E-11                   | Aebp1, Anxa5, C1ra, Cfl1, Clic4, Col1a2, Dbi, Efemp1, Efemp2, Ftl1, Gsn, Hist1h2bk, Hist2h4, Igf2, Inhba, Mdh2, Myl12b, Myl6, Pgm1, Psm3, Sh3bgrl3, Thbs2, Ywhab, Ywhae, Ywhag, Ywhaz |
| membrane-bounded vesicle                | 24                  | 1.16E-11                   | Aebp1, Anxa5, C1ra, Cfl1, Clic4, Col1a2, Dbi, Efemp1, Efemp2, Ftl1, Gsn, Hist2h4, Igf2, Mdh2, Myl12b, Myl6, Pgm1, Psm3, Sh3bgrl3, Thbs2, Ywhab, Ywhae, Ywhag, Ywhaz                   |
| extracellular region part               | 25                  | 1.16E-11                   | Aebp1, Anxa5, C1ra, Cfl1, Clic4, Col1a2, Dbi, Efemp1, Efemp2, Gsn, Hist1h2bk, Hist2h4, Igf2, Inhba, Mdh2, Myl12b, Myl6, Pgm1, Psm3, Sh3bgrl3, Thbs2, Ywhab, Ywhae, Ywhag, Ywhaz       |
| extracellular exosome                   | 22                  | 1.16E-11                   | Aebp1, Anxa5, C1ra, Cfl1, Clic4, Col1a2, Dbi, Efemp1, Efemp2, Gsn, Hist2h4, Igf2, Mdh2, Myl12b, Myl6, Pgm1, Psm3, Sh3bgrl3, Ywhab, Ywhae, Ywhag, Ywhaz                                |
| focal adhesion                          | 9                   | 2.88E-07                   | Anxa5, Cfl1, Gsn, Npm1, Rpl8, Ywhab, Ywhae, Ywhag, Ywhaz                                                                                                                              |
| extracellular space                     | 12                  | 3.20E-06                   | Aebp1, Anxa5, C1ra, Cfl1, Col1a2, Dbi, Efemp1, Gsn, Hist1h2bk, Igf2,                                                                                                                  |

|                                                |    |          |                                                                                                                  |
|------------------------------------------------|----|----------|------------------------------------------------------------------------------------------------------------------|
|                                                |    |          | Inhba, Ywhaz                                                                                                     |
| cytosol                                        | 13 | 2.65E-05 | Cfl1, Clic4, Gsn, Npm1, Pgm1, Ptms, Rpl8, Rps18, Ywhab, Ywhae, Ywhag, Ywhaq, Ywhaz                               |
| cytoplasmic vesicle part                       | 7  | 1.04E-04 | Clic4, Ftl1, Ywhab, Ywhae, Ywhag, Ywhaq, Ywhaz                                                                   |
| cytoplasmic membrane-bounded vesicle           | 9  | 3.24E-04 | Clic4, Dbi, Ftl1, Thbs2, Ywhab, Ywhae, Ywhag, Ywhaq, Ywhaz                                                       |
| cytoplasmic vesicle membrane                   | 6  | 5.14E-04 | Clic4, Ywhab, Ywhae, Ywhag, Ywhaq, Ywhaz                                                                         |
| blood microparticle                            | 4  | 6.77E-04 | Anxa5, C1ra, Gsn, Ywhaz                                                                                          |
| cell junction                                  | 9  | 1.06E-03 | Cfl1, Clic4, Gsn, Npm1, Rpl8, Ywhab, Ywhae, Ywhag, Ywhaz                                                         |
| macromolecular complex                         | 16 | 4.47E-03 | Clic4, Col1a2, Ftl1, Gsn, Hist1h2bk, Hist2h4, Inhba, Myl12b, Myl6, Npm1, Psm3, Rps18, Ywhab, Ywhae, Ywhaq, Ywhaz |
| extracellular matrix                           | 5  | 1.21E-02 | Aebp1, Col1a2, Efemp1, Efemp2, Thbs2                                                                             |
| protein complex                                | 14 | 1.21E-02 | Clic4, Col1a2, Ftl1, Gsn, Hist1h2bk, Hist2h4, Inhba, Myl12b, Myl6, Psm3, Ywhab, Ywhae, Ywhaq, Ywhaz              |
| <b>GOBP</b>                                    |    |          |                                                                                                                  |
| regulation of biological quality               | 14 | 1.60E-02 | Anxa5, Cfl1, Clic4, Col1a2, Dbi, Ftl1, Inhba, Myl12b, Thbs2, Tmsb10, Ywhab, Ywhae, Ywhag, Ywhaz                  |
| <b>GOMF (Gene Ontology Molecular Function)</b> |    |          |                                                                                                                  |
| calcium ion binding                            | 8  | 4.03E-03 | Anxa5, C1ra, Efemp1, Efemp2, Gsn, Myl12b, Myl6, Thbs2                                                            |
| phosphoserine binding                          | 2  | 2.65E-02 | Ywhab, Ywhae                                                                                                     |
| rRNA binding                                   | 3  | 4.06E-02 | Npm1, Rpl8, Rps18                                                                                                |
| protein domain specific binding                | 6  | 4.06E-02 | Gsn, Ywhab, Ywhae, Ywhag, Ywhaq, Ywhaz                                                                           |
| <b>Pfam</b>                                    |    |          |                                                                                                                  |
| 14-3-3 protein                                 | 4  | 5.84E-08 | Ywhab, Ywhae, Ywhag, Ywhaq                                                                                       |

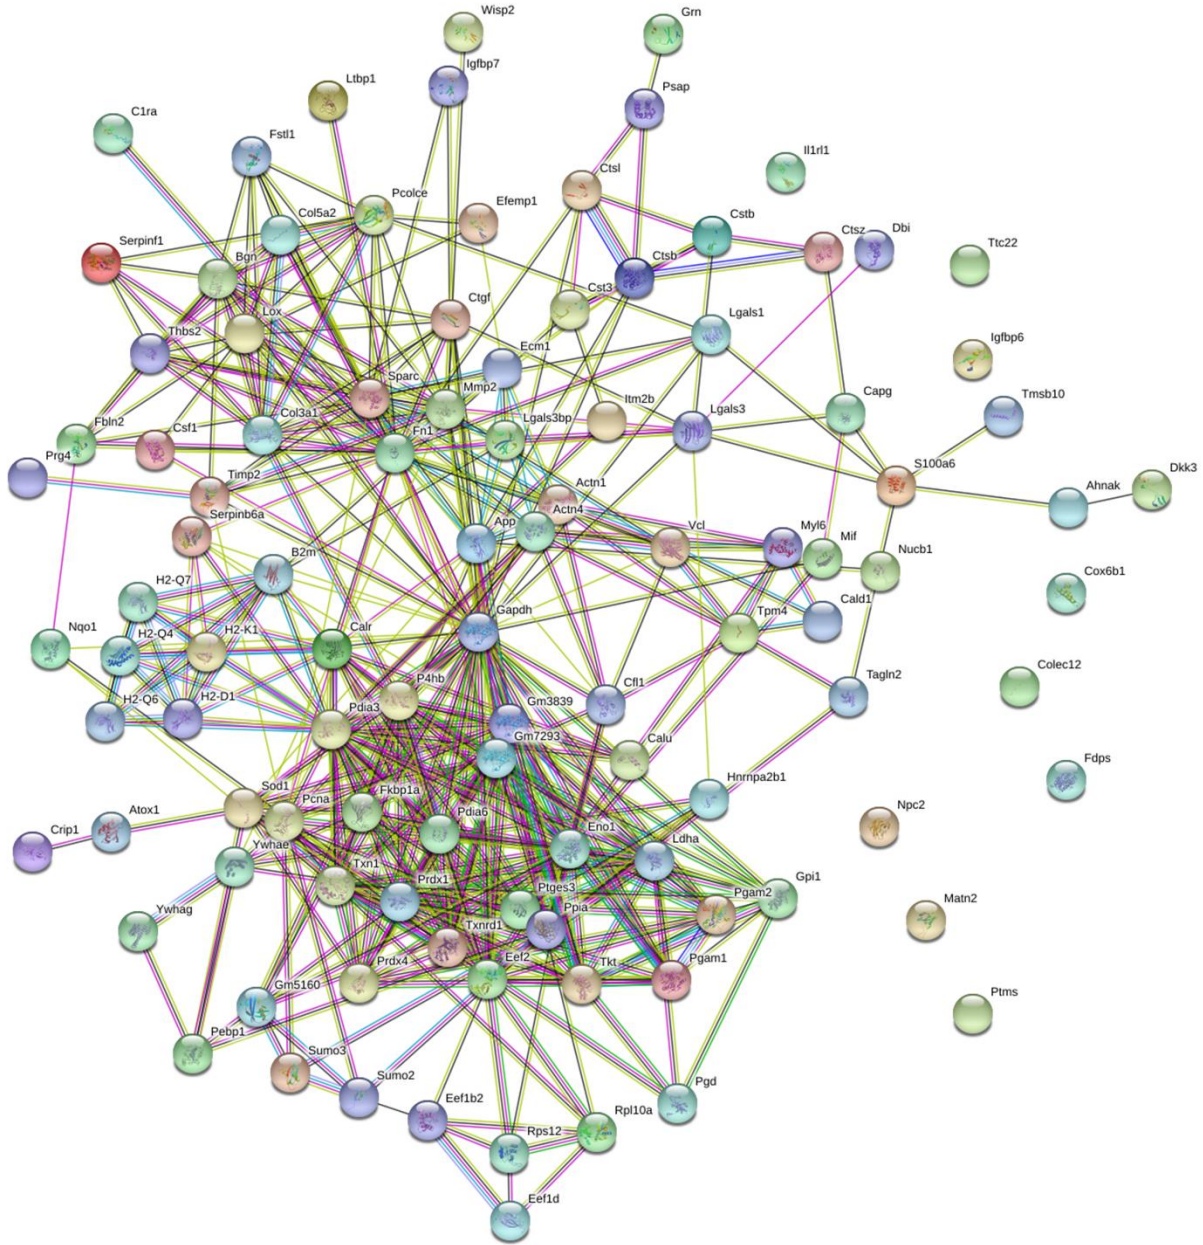

**Figure S1** String DB network illustrating interactions between proteins in the osteocyte secretome, with significant degree of protein-protein interaction ( $p < 10^{-16}$ )

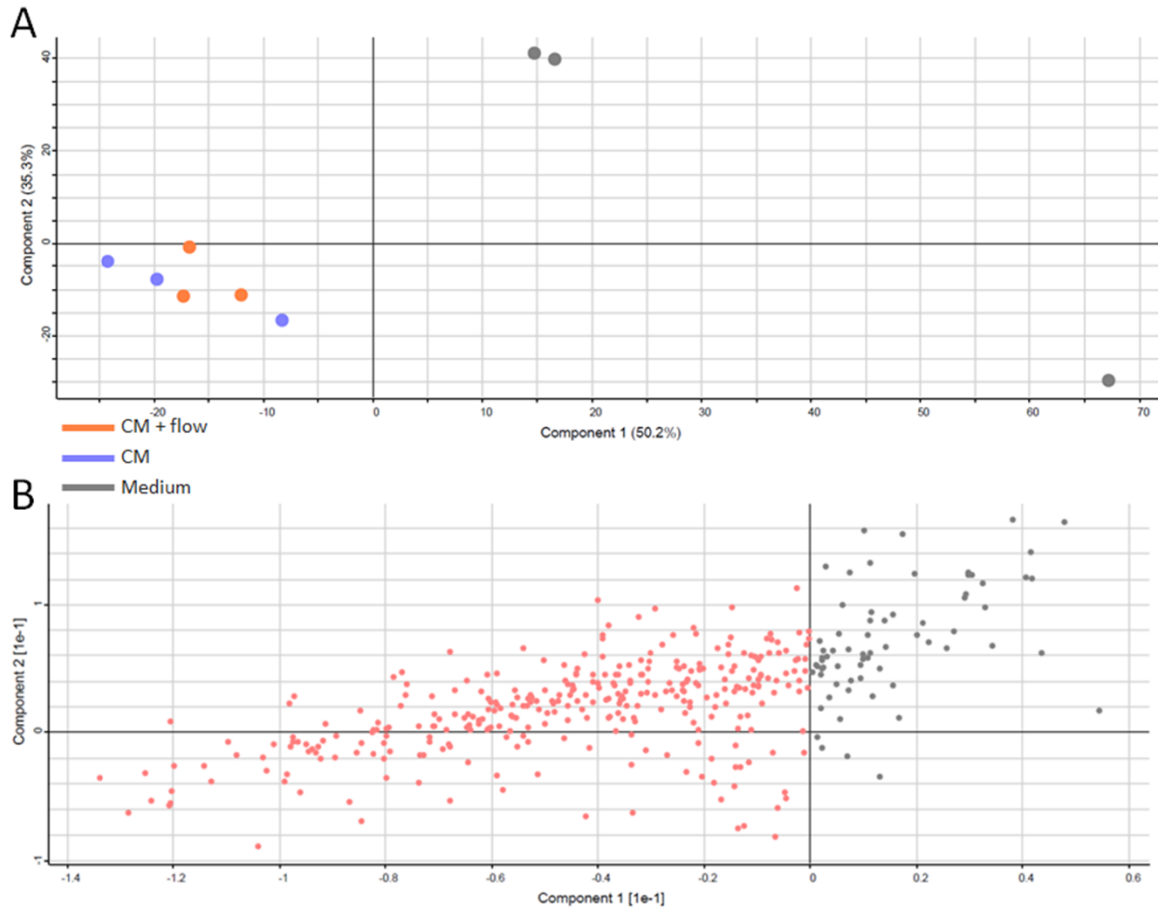

**Figure S2** Principal Component Analysis (PCA) revealing the variance between the three experimental groups and indicating three main clusters of data (C). The proteins primarily driving the separation between the medium groups and the control groups are highlighted in red (D).

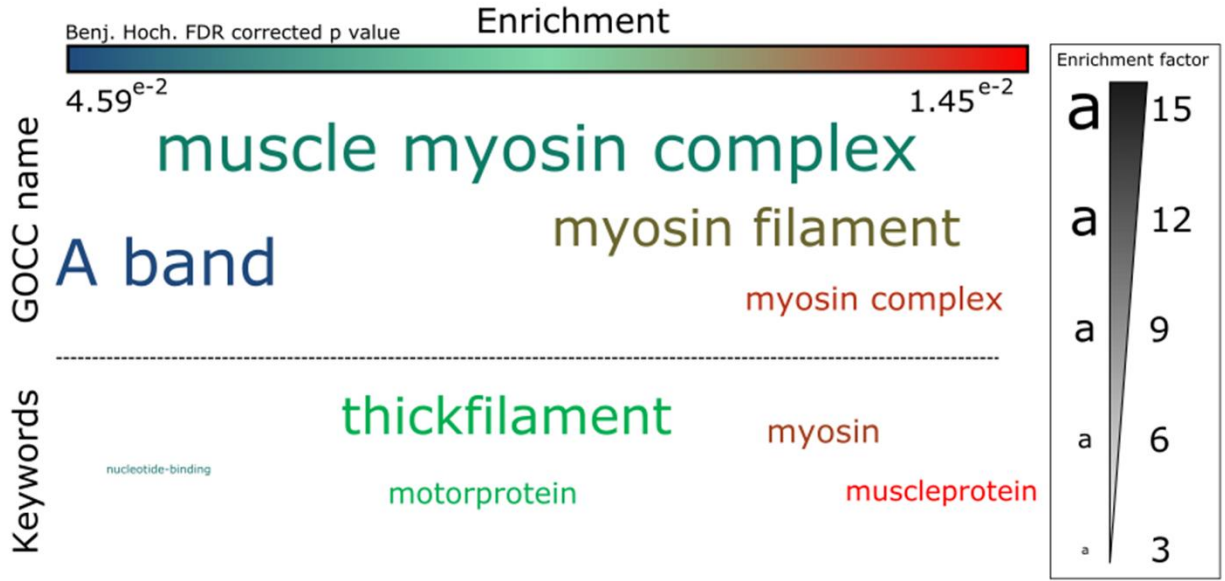

**Figure S3** Enrichment analysis of GOCC terms and Uniprot keywords in proteins with greater expression in control medium samples, using Fisher’s exact test represented as a word cloud (D). The size of the word represents enrichment of terms, while colour represents FDR corrected p value. All terms with a minimum 0.05 FDR corrected p value were included.



| Pathway description                          | Observed gene count | False discovery rate (FDR) |
|----------------------------------------------|---------------------|----------------------------|
| <b>GOCC</b>                                  |                     |                            |
| myosin filament                              | 6                   | 1.67E-10                   |
| myofibril                                    | 7                   | 6.42E-06                   |
| actin cytoskeleton                           | 8                   | 2.41E-05                   |
| muscle myosin complex                        | 3                   | 2.66E-05                   |
| contractile fiber                            | 6                   | 1.08E-04                   |
| stress fiber                                 | 4                   | 2.23E-04                   |
| myosin complex                               | 4                   | 2.23E-04                   |
| sarcomere                                    | 5                   | 5.37E-04                   |
| filopodium                                   | 4                   | 8.68E-04                   |
| intracellular non-membrane-bounded organelle | 15                  | 3.03E-03                   |
| <b>GOBP</b>                                  |                     |                            |
| mesenchyme migration                         | 4                   | 3.24E-07                   |
| muscle contraction                           | 6                   | 2.41E-04                   |
| muscle filament sliding                      | 3                   | 5.11E-04                   |
| mesenchyme morphogenesis                     | 4                   | 5.46E-04                   |
| tissue morphogenesis                         | 8                   | 4.41E-03                   |
| striated muscle contraction                  | 4                   | 4.56E-03                   |
| skeletal muscle contraction                  | 3                   | 8.26E-03                   |
| <b>GOMF</b>                                  |                     |                            |
| microfilament motor activity                 | 4                   | 3.47E-05                   |
| purine ribonucleoside binding                | 14                  | 3.67E-05                   |
| purine ribonucleotide binding                | 14                  | 3.67E-05                   |
| purine ribonucleoside triphosphate binding   | 14                  | 3.67E-05                   |
| small molecule binding                       | 15                  | 2.09E-04                   |
| anion binding                                | 15                  | 2.31E-04                   |
| motor activity                               | 5                   | 2.42E-04                   |
| organic cyclic compound binding              | 20                  | 3.93E-04                   |
| ATP binding                                  | 11                  | 8.46E-04                   |
| heterocyclic compound binding                | 19                  | 1.34E-03                   |
| <b>Pfam</b>                                  |                     |                            |

|                                         |   |          |
|-----------------------------------------|---|----------|
| Actin                                   | 4 | 1.78E-05 |
| Myosin N-terminal SH3-like domain       | 3 | 9.33E-05 |
| Myosin tail                             | 3 | 3.72E-04 |
| Myosin head (motor domain)              | 3 | 1.07E-03 |
| Ribosomal protein L6e                   | 2 | 1.07E-03 |
| Ribosomal protein L6, N-terminal domain | 2 | 1.07E-03 |

**Table S4** Functional enrichments in Medium proteins using String DB, with observed gene count out of a total 35 proteins with an FDR cut-off of 2%.

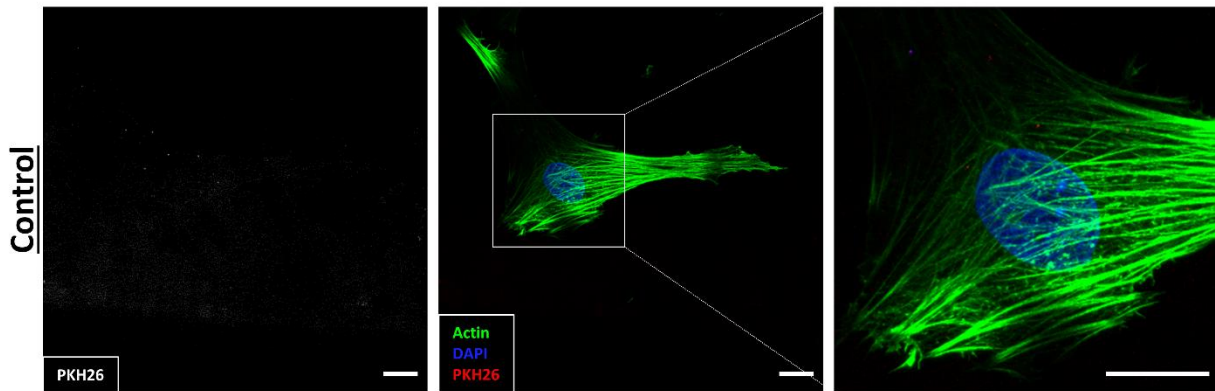

**Figure S4** Control samples with no EVs and PKH26 staining demonstrating minimal unspecific fluorescence (Scale = 10 $\mu$ m).
